# Supplementary material for: Tumor Suppressor Gene XEDAR Promotes Differentiation and Suppresses Proliferation and Migration of Gastric Cancer Cells Through Upregulating the RELA/LXRα Axis and Deactivating the Wnt/β-Catenin Pathway
Source: PubMed Central journal article supplement — Cell Transplant. 2021 Feb 26;30:0963689721996346. doi: 10.1177/0963689721996346 (PMC7923976; doi:10.1177/0963689721996346), 2021-02-26

A

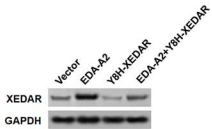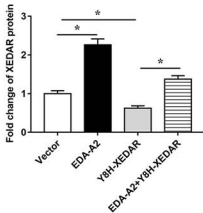

B

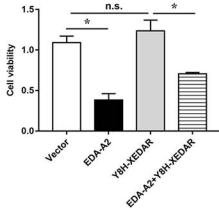

**A**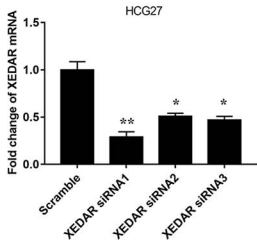**B**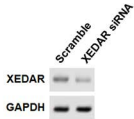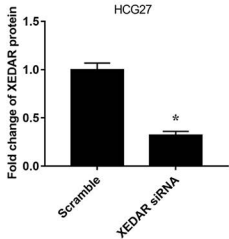

A

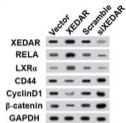

Fold change of proteins

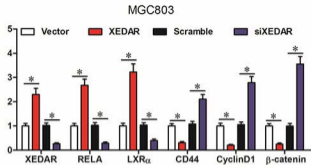

B

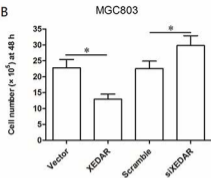

C

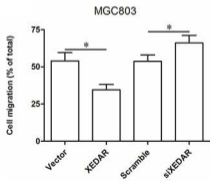

D

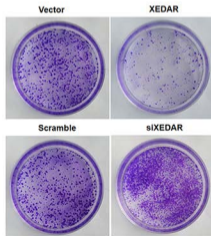

Number of colony formation

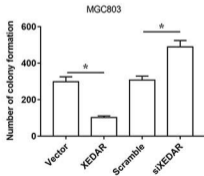

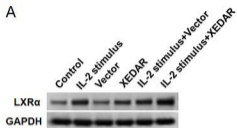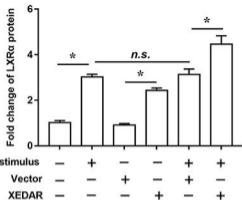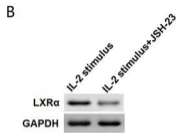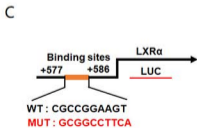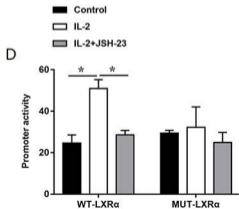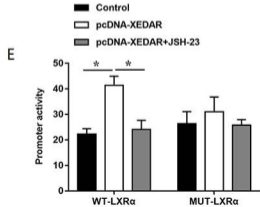

A

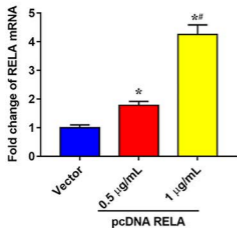

B

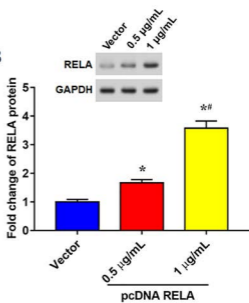

C

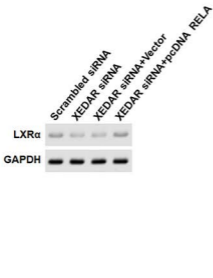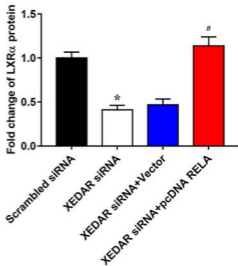

Supplement: sj-pdf-1-cll-10.1177_0963689721996346.pdf [file sj-pdf-1-cll-10.1177_0963689721996346.pdf]
